# Supplementary material for: Antioxidants Improve the Proliferation and Efficacy of hUC-MSCs against H2O2-Induced Senescence
Source: MDPI journal article supplement (doi:10.3390/antiox12071334), 2023-06-24
Supplement: s1 [file s1]

| KEGG ID  | Term                | NMN-Symbols                                                                                                                                                                                                                                                                                                 | CoQ10-Symbols                                                                                                                                                                                                                                                                                                                                                                                                        |
|----------|---------------------|-------------------------------------------------------------------------------------------------------------------------------------------------------------------------------------------------------------------------------------------------------------------------------------------------------------|----------------------------------------------------------------------------------------------------------------------------------------------------------------------------------------------------------------------------------------------------------------------------------------------------------------------------------------------------------------------------------------------------------------------|
| hsa03030 | DNA replication     | MCM3/MCM6/MCM4/<br>POLA1/RFC3/RPA1/<br>POLD3/MCM2/PCNA/<br>PRIM1/POLE3/DNA2/<br>PRIM2/POLE/FEN1/<br>MCM5/RFC4/MCM7/<br>POLE2/RFC1/RFC2                                                                                                                                                                      | MCM3/PCNA/MCM6/<br>MCM4/MCM2/RPA1/<br>RFC3/PRIM1/MCM7/<br>POLE3/MCM5/POLD3/<br>FEN1/RPA2/RFC4/<br>POLA1/RFC5/DNA2/<br>PRIM2/RFC2/RPA3/<br>POLE2/POLA2                                                                                                                                                                                                                                                                |
| hsa04110 | cell cycle          | MCM3/MCM6/MCM4/<br>RBL1/ANAPC1/ORC1/<br>MCM2/PCNA/ESPL1/<br>SMC3/PRKDC/CDK1/CDC7<br>/<br>BUB3/STAG2/E2F2/SKP2/<br>BUB1B/BUB1/DBF4/<br>YWHAH/STAG1/CDC6/<br>SMC1A/RAD21/PKMYT1/<br>CDC25B/MCM5/MAD2L1/<br>YWHAQ/YWHAZ/<br>CDK6/WEE1/GSK3B/<br>MCM7/CDKN2D/ORC3/<br>CCNB2/TFDP1/ANAPC10/<br>SMAD2/CCNE2/CCNB1 | MCM3/PCNA/MCM6/<br>MCM4/MCM2/CDC6/<br>MCM7/ORC1/RBL1/<br>MCM5/YWHAQ/CCNB<br>1/<br>CDC7/SMC3/CDK1/<br>CCNB2/BUB1B/YWHA<br>Z/<br>STAG2/CDC25A/YWH<br>AH/<br>ORC3/BUB3/DBF4/<br>MAD2L1/SMC1A/E2F2<br>/<br>TTK/PRKDC/STAG1/<br>TFDP1/CDK2/YWHA<br>E/<br>RBX1/ORC5/E2F1/<br>PTTG1/SKP1/CDC45/<br>CCNA1/BUB1/ESPL1/<br>CHEK1/RAD21/YWHA<br>G/<br>ANAPC10/YWHAB/OR<br>C6/<br>ANAPC1/SMAD2/<br>MAD2L2/PKMYT1/<br>HDAC2/CCNE2 |
| hsa03430 | Mismatch repair     | MSH2/RFC3/RPA1/EXO1/<br>POLD3/PCNA/MSH6/RFC4/<br>MLH3/RFC1/RFC2                                                                                                                                                                                                                                             | PCNA/RPA1/RFC3/<br>MSH2/EXO1/POLD3/<br>RPA2/RFC4/RFC5/<br>MSH6/MLH1/RFC2/<br>MLH3/RPA3                                                                                                                                                                                                                                                                                                                               |
| hsa03420 | Nucleotide excision | RFC3/RPA1/POLD3/<br>PCNA/POLE3/POLE/                                                                                                                                                                                                                                                                        | PCNA/RPA1/RFC3/<br>POLE3/POLD3/RPA2/                                                                                                                                                                                                                                                                                                                                                                                 |

|          |                                     |                                                                                                                                                                                                                                |                                                                                                                                                                                                                                                                                                                                                                          |
|----------|-------------------------------------|--------------------------------------------------------------------------------------------------------------------------------------------------------------------------------------------------------------------------------|--------------------------------------------------------------------------------------------------------------------------------------------------------------------------------------------------------------------------------------------------------------------------------------------------------------------------------------------------------------------------|
|          | repair                              | GTF2H1/RFC4/POLE2/<br>GTF2H3/CUL4B/RFC1/RFC<br>2                                                                                                                                                                               | RFC4/RFC5/MNAT1/<br>GTF2H1/RBX1/RFC2/<br>RAD23B/RPA3/POLE2                                                                                                                                                                                                                                                                                                               |
| hsa03013 | RNA<br>transport                    | NUP50/NDC1/EIF1AX/<br>EIF3C/EIF2S2/NUP107/<br>NUP155/EIF5/NUP205/<br>KPNB1/EIF2S3/RAN/TGS1/<br>GEMIN5/SEH1L/XPO1/NU<br>P160/<br>RPP30/EIF2S1/EIF3E/NUP9<br>8/<br>NUP153/SUMO1/NUP43/<br>NUP133/XPO5/NUP88/<br>FMR1/NCBP1/STRAP | NDC1/NUP155/NUP50/<br>RAN/EIF1AX/SUMO3/<br>NUP133/NUP88/NUP10<br>7/<br>SEH1L/EIF2S1/KPNB1/<br>EIF3E/TGS1/RBM8A/<br>EIF2B3/DDX20/EIF5/<br>SUMO1/ELAC2/STRAP<br>/<br>GEMIN5/RPP30/EIF2S3<br>/<br>EIF4E/EIF2S2/NUP160/<br>POP1/XPO5/SUMO2/<br>NUP85/NUP98/EIF3H/<br>NUP37/NCBP2/GEMIN<br>4/<br>NUP54/XPO1/EIF3A/<br>NUP205/CLNS1A/<br>RPP38/NXT2/FXR1/<br>GEMIN2/FMR1/EIF5B |
| hsa03440 | Homologo<br>us<br>recombina<br>tion | BRCA2/BRCA1/RPA1/<br>BARD1/BLM/POLD3/<br>RAD54L/XRCC2/RBBP8/<br>ABRAXAS1/MRE11/BRIP1                                                                                                                                           | RPA1/BLM/POLD3/<br>RPA2/BRCA1/BRCA2/<br>RAD54L/RBBP8/BRCC<br>3/<br>BARD1/XRCC2/TOPBP<br>1/<br>ABRAXAS1/RPA3/<br>MRE11/NBN/RAD51C                                                                                                                                                                                                                                         |
| hsa03410 | Base<br>excision<br>repair          | POLD3/PCNA/POLE3/<br>POLE/FEN1/NEIL3/UNG/<br>POLE2/PARP4/HMGB1/PA<br>RP1                                                                                                                                                       | PCNA/POLE3/POLD3/<br>HMGB1/FEN1/UNG/<br>PARP2/NEIL3/PARP1/<br>POLE2                                                                                                                                                                                                                                                                                                      |

Supplementary Table S1 : Symbol genes involved in KEGG pathways associated with DNA replication and repair.

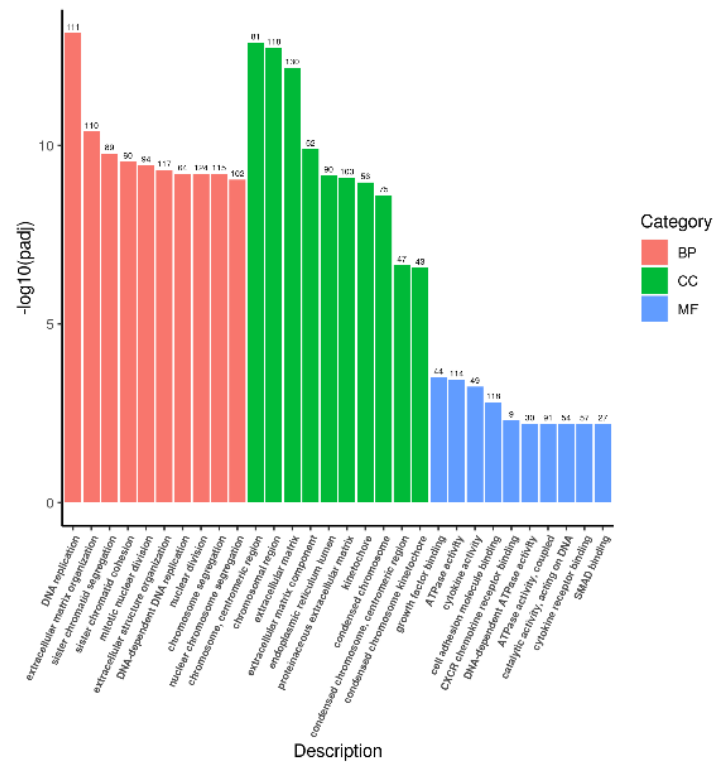

(A)

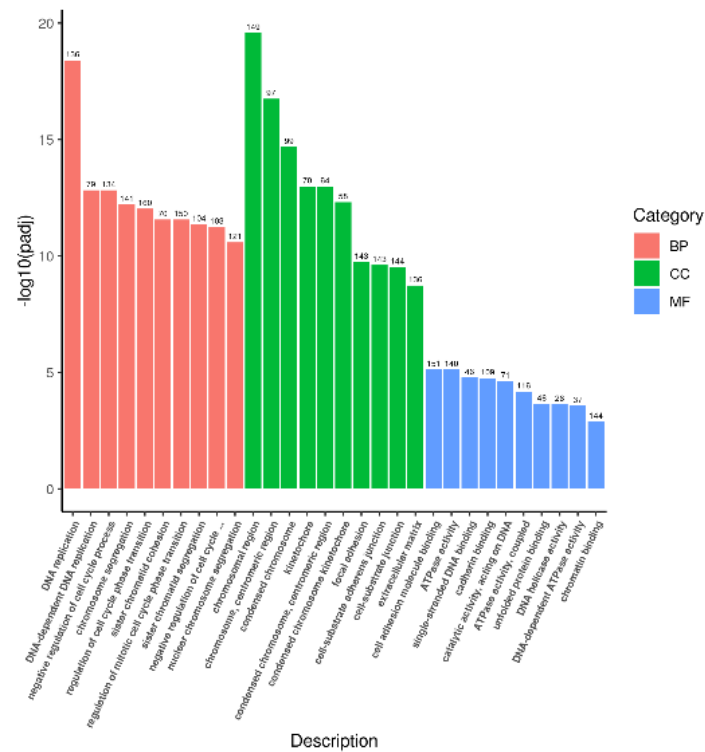

(B)

Supplementary Figure S1: Functional classification of GO enrichment clusters.

According to ontology classification, biological process (BP), cellular component (CC), and molecular function (MF), the distribution of GO terms for DEG between the control and drug treatment groups uc-MSCs is annotated. (A) NMN *vs.* P12 GO enrichment analysis plot; (B) CoQ10 *vs.* P12 GO enrichment analysis plot. The number of DEGs associated with each term is shown.

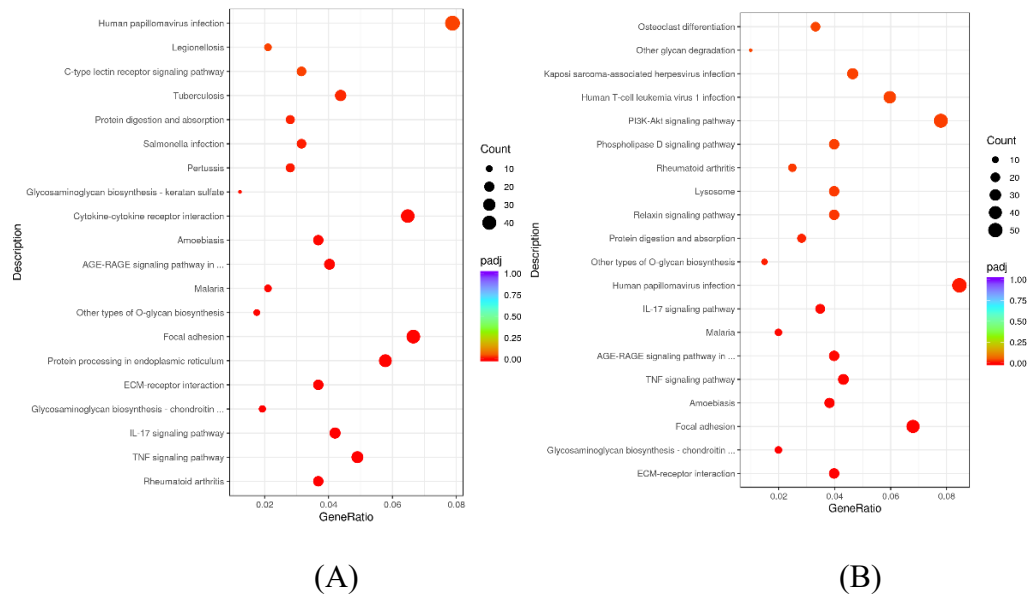

Supplementary Figure S2: KEGG pathway enrichment analysis for down-regulated DEGs in treated groups. (A) The down-regulation of DEGs in the NMN treatment group significantly enriched the first 20 signaling pathways. (B) The down-regulation of DEGs in the CoQ10 treatment group significantly enriched the first 20 signaling pathways.
